# Supplementary material for: Clinical outcomes, predictors of prognosis and health economics consequences in IBD patients after discontinuation of the first biological therapy
Source: PubMed Central journal article supplement — Ther Adv Gastroenterol. 2020 Dec 27;13:1756284820981216. doi: 10.1177/1756284820981216 (PMC8162203; doi:10.1177/1756284820981216), 2020-12-27
Supplement: sj-pdf-1-tag-10.1177_1756284820981216.pdf [file sj-pdf-1-tag-10.1177_1756284820981216.pdf]

**Table 7 (Supplemental) - Details of adverse outcomes after gastroenterologist-initiated discontinuation of biologics**

| Patient number/ID | AO < 6 months | AO 6-12 months | AO 12-24 months | AO >24 months |
|-------------------|---------------|----------------|-----------------|---------------|
| 2                 |               |                |                 | √             |
| 7                 |               |                |                 | √             |
| 11                | √             |                |                 | √             |
| 14                |               | √√             | √√√             | √√            |
| 15                | √√            |                |                 |               |
| 18                |               |                |                 | √√            |
| 21                | √√            |                |                 | √√√           |
| 24                | √             | √              |                 | √√            |
| 25                |               |                | √√√             | √√√           |
| 26                |               |                | √√              | √             |
| 32                | √             | √              |                 |               |
| 35                |               | √              | √               |               |
| 36                |               |                | √               | √             |
| 40                | √√√           |                |                 |               |
| 42                |               | √              | √               |               |
| 45                |               |                | √√              |               |
| 51                |               |                |                 | √√            |
| 54                |               |                |                 |               |
| 62                |               |                |                 |               |
| 65                |               |                |                 | √√            |
| 66                | √             | √√             |                 | √√√           |
| 70                |               | √√             | √√√√            | √√√           |
| 71                |               |                | √√              |               |
| 72                | √√√           |                | √               | √√            |
| 74                |               | √√√√           |                 | √             |
| 76                |               |                | √               | √√            |
| 78                |               | √√             | √√              | √√√           |
| 79                | √√            | √              | √√              | √√            |
| 82                | √√            | √              | √√              | √√            |
| 83                |               | √√             |                 | √√            |
| 84                |               |                |                 |               |
| 86                | √             |                |                 | √√            |
| 87                | √√            | √√             |                 |               |
| 88                |               |                | √√√             | √√√           |
| 92                | √             |                | √               |               |
| 93                |               |                | √√              |               |
| 97                |               |                |                 |               |
| 100               |               |                |                 | √√            |
| 101               | √√√           |                |                 |               |
| 105               |               |                |                 |               |
| 107               | √             | √              |                 |               |
| 108               | √√            | √√             |                 | √             |
| 110               |               |                | √√              |               |
