# Supplementary material for: Clinical outcomes, predictors of prognosis and health economics consequences in IBD patients after discontinuation of the first biological therapy
Source: PubMed Central journal article supplement — Ther Adv Gastroenterol. 2020 Dec 27;13:1756284820981216. doi: 10.1177/1756284820981216 (PMC8162203; doi:10.1177/1756284820981216), 2020-12-27
Supplement: sj-pdf-2-tag-10.1177_1756284820981216.pdf [file sj-pdf-2-tag-10.1177_1756284820981216.pdf]

**Supplemental table 8- Predictors of outcomes after biologics discontinuation in Crohn's Disease cohort**

| Predictors of poor outcomes        | Time interval when significant                                | AUROC                                        | Odds ratio (OR) and confidence intervals                                     | Statistical significance |
|------------------------------------|---------------------------------------------------------------|----------------------------------------------|------------------------------------------------------------------------------|--------------------------|
| <b>Secondary non-response</b>      | • < 6months                                                   | • 0.6213                                     | • OR 4.29 95% CI ( 1.15 , 14.99 )                                            | • p=0.02                 |
|                                    | • 6-12months                                                  | • 0.6628                                     | • OR 5.93 95% CI ( 1.32 , 25.64 )                                            | • p= 0.02                |
|                                    | • >24 months                                                  | • 0.6575                                     | • OR 6.53 95% CI ( 1.97 , 21.75 )                                            | • p=0.002                |
| <b>First biologic</b>              | • 12-24 months                                                | • 0.6308                                     | • OR 2.77 95% CI ( 1.22 , 7.03 )                                             | • p= 0.02                |
| <b>Predictors of good outcomes</b> |                                                               |                                              |                                                                              |                          |
| <b>Male sex</b>                    | • >24 months                                                  | • 0.6645                                     | • OR 0.21 95% CI ( 0.05 , 0.69 )                                             | • p=0.02                 |
| <b>Elective stop</b>               | • <6 months                                                   | • 0.6376                                     | • OR 0.28 95% CI ( 0.06 , 0.98 )                                             | • p=0.07                 |
|                                    | • 6-12 months                                                 | • 0.7475                                     | None of the patients who had elective stop experienced an adverse outcome    | • NA                     |
| <b>Other predictors</b>            |                                                               |                                              |                                                                              |                          |
| <b>Sex</b>                         | • < 6months                                                   | • 0.5558                                     | • OR 0.63 95% CI ( 0.18 , 1.96 )                                             | • p= 0.44                |
|                                    | • 6-12months                                                  | • 0.5055                                     | • OR 0.96 95% CI ( 0.23 , 3.82 )                                             | • p= 0.95                |
|                                    | • 12-24 months                                                | • 0.5266                                     | • OR 1.24 95% CI ( 0.42 , 3.64 )                                             | • p= 0.69                |
| <b>Race</b>                        | • <6 months                                                   | • 0.5685                                     | • OR 0.79 95% CI (0.52, 1.24)                                                | • p= 0.28                |
|                                    | • 6-12months                                                  | • 0.5600                                     | • OR 1.45 95% CI ( 0.8 , 2.87 )                                              | • p= 0.26                |
|                                    | • 12-24 months                                                | • 0.5608                                     | • OR 0.85 95% CI ( 0.57 , 1.32 )                                             | • p= 0.45                |
|                                    | • >24 months                                                  | • 0.5313                                     | • OR 0.94 95% CI ( 0.63 , 1.46 )                                             | • p= 0.78                |
| <b>Rectal 5-ASA at baseline</b>    | • < 6months<br>• 6-12months<br>• 12-24 months<br>• >24 months | • 0.5312<br>• 0.5297<br>• 0.5319<br>• 0.5323 | None of the patients who were on this treatment experienced adverse outcomes | NA                       |
| <b>Thiopurine at baseline</b>      | • < 6months                                                   | • 0.5833                                     | • OR 2 95% CI ( 0.63 , 6.32 )                                                | • p= 0.23                |
|                                    | • 6-12months                                                  | • 0.6326                                     | • OR 0.21 95% CI ( 0.01 , 1.19 )                                             | • p= 0.15                |
|                                    | • 12-24 months                                                | • 0.5120                                     | • OR 1.11 95% CI ( 0.35 , 3.26 )                                             | • p= 0.85                |
|                                    | • >24 months                                                  | • 0.5357                                     |                                                                              | • p= 0.57                |

|                                    |                                                                                                                                 |                                                                                                          |                                                                                                                                                                                                                                                                                        |                                                                                                              |
|------------------------------------|---------------------------------------------------------------------------------------------------------------------------------|----------------------------------------------------------------------------------------------------------|----------------------------------------------------------------------------------------------------------------------------------------------------------------------------------------------------------------------------------------------------------------------------------------|--------------------------------------------------------------------------------------------------------------|
|                                    |                                                                                                                                 |                                                                                                          | <ul style="list-style-type: none"> <li>OR 0.72 95% CI ( 0.21 , 2.13 )</li> </ul>                                                                                                                                                                                                       |                                                                                                              |
| <b>Steroid therapy at baseline</b> | <ul style="list-style-type: none"> <li>&lt; 6months</li> <li>6-12months</li> <li>12-24 months</li> <li>&gt;24 months</li> </ul> | <ul style="list-style-type: none"> <li>0.5126</li> <li>0.5380</li> <li>0.5811</li> <li>0.5168</li> </ul> | <ul style="list-style-type: none"> <li>OR 1.14 95% CI ( 0.29 , 3.74 )</li> <li>OR 1.44 95% CI ( 0.29 , 5.89 )</li> <li>OR 0.35 95% CI ( 0.05 , 1.38 )</li> <li>OR 0.84 95% CI ( 0.22 , 2.63 )</li> </ul>                                                                               | <ul style="list-style-type: none"> <li>p=0.84</li> <li>p= 0.62</li> <li>p= 0.19</li> <li>p= 0.77</li> </ul>  |
| <b>Endoscopic activity</b>         | <ul style="list-style-type: none"> <li>&lt; 6months</li> <li>6-12months</li> <li>12-24 months</li> <li>&gt;24 months</li> </ul> | <ul style="list-style-type: none"> <li>0.5495</li> <li>0.568</li> <li>0.5086</li> <li>0.5101</li> </ul>  | <ul style="list-style-type: none"> <li>OR 1.19 95% CI ( 0.76 , 2.29 )</li> <li>OR 0.77 95% CI ( 0.5 , 1.26 )</li> <li>OR 0.92 95% CI ( 0.63 , 1.44 )</li> <li>OR 0.91 95% CI ( 0.63 , 1.4 )</li> </ul>                                                                                 | <ul style="list-style-type: none"> <li>p= 0.51</li> <li>p= 0.25</li> <li>p= 0.69</li> <li>p= 0.64</li> </ul> |
| <b>First biologic</b>              | <ul style="list-style-type: none"> <li>&lt; 6months</li> <li>6-12months</li> <li>&gt;24 months</li> </ul>                       | <ul style="list-style-type: none"> <li>0.5204</li> <li>0.6338</li> <li>0.5247</li> </ul>                 | <ul style="list-style-type: none"> <li>OR 1.35 95% CI ( 0.55 , 3.09 )</li> <li>OR 2.33 95% CI ( 0.84 , 6.22 )</li> <li>OR 1.01 95% CI ( 0.41 , 2.27 )</li> </ul>                                                                                                                       | <ul style="list-style-type: none"> <li>p= 0.49</li> <li>p= 0.09</li> <li>p= 0.99</li> </ul>                  |
| <b>Primary non-response</b>        | <ul style="list-style-type: none"> <li>&lt; 6months</li> <li>6-12months</li> <li>12-24 months</li> <li>&gt;24 months</li> </ul> | <ul style="list-style-type: none"> <li>0.5149</li> <li>0.5358</li> <li>0.5266</li> <li>0.5269</li> </ul> | <ul style="list-style-type: none"> <li>OR 1.77 95% CI ( 0.09 , 13.16 )</li> <li>OR 3.03 95% CI ( 0.15 , 23.83 )</li> </ul> <p>None of the patients who were had primary non-response experienced adverse outcomes</p>                                                                  | <ul style="list-style-type: none"> <li>p= 0.62</li> <li>p= 0.35</li> <li>NA</li> <li>NA</li> </ul>           |
| <b>Secondary non-response</b>      | <ul style="list-style-type: none"> <li>12-24 months</li> </ul>                                                                  | <ul style="list-style-type: none"> <li>0.5612</li> </ul>                                                 | <ul style="list-style-type: none"> <li>OR 2.28 95% CI ( 0.57 , 7.84 )</li> </ul>                                                                                                                                                                                                       | <ul style="list-style-type: none"> <li>p= 0.21</li> </ul>                                                    |
| <b>Side effects</b>                | <ul style="list-style-type: none"> <li>&lt; 6months</li> <li>6-12months</li> <li>12-24 months</li> <li>&gt;24 months</li> </ul> | <ul style="list-style-type: none"> <li>0.5320</li> <li>0.5693</li> <li>0.5379</li> <li>0.5405</li> </ul> | <ul style="list-style-type: none"> <li>OR 0.49 95% CI ( 0.03 , 2.8 )</li> </ul> <p>None of the patients who had side effects experienced adverse outcomes</p> <ul style="list-style-type: none"> <li>OR 0.42 95% CI ( 0.02 , 2.34 )</li> <li>OR 0.38 95% CI ( 0.02 , 2.15 )</li> </ul> | <ul style="list-style-type: none"> <li>p= 0.51</li> <li>NA</li> <li>p= 0.41</li> <li>p= 0.37</li> </ul>      |
| <b>Elective stop</b>               | <ul style="list-style-type: none"> <li>12-24 months</li> <li>&gt;24 months</li> </ul>                                           | <ul style="list-style-type: none"> <li>0.5831</li> <li>0.5949</li> </ul>                                 | <ul style="list-style-type: none"> <li>OR 0.59 95% CI (0.18 , 1.68)</li> <li>OR 0.44 95% CI ( 0.13 , 1.3 )</li> </ul>                                                                                                                                                                  | <ul style="list-style-type: none"> <li>p= 0.34</li> <li>p= 0.16</li> </ul>                                   |

|                                               |                                                                                                                                         |                                                                                                                  |                                                                                                                                                                                                                                                                     |                                                                                                                 |
|-----------------------------------------------|-----------------------------------------------------------------------------------------------------------------------------------------|------------------------------------------------------------------------------------------------------------------|---------------------------------------------------------------------------------------------------------------------------------------------------------------------------------------------------------------------------------------------------------------------|-----------------------------------------------------------------------------------------------------------------|
| <b>Rectal 5-ASA following discontinuation</b> | <ul style="list-style-type: none"> <li>• &lt; 6months</li> <li>• 6-12months</li> <li>• 12-24 months</li> <li>• &gt;24 months</li> </ul> | <ul style="list-style-type: none"> <li>• 0.5208</li> <li>• 0.5198</li> <li>• 0.5213</li> <li>• 0.5215</li> </ul> | None of the patients who were on this treatment experienced adverse outcomes                                                                                                                                                                                        | NA                                                                                                              |
| <b>Thiopurine following discontinuation</b>   | <ul style="list-style-type: none"> <li>• &lt; 6months</li> <li>• 6-12months</li> <li>• 12-24 months</li> <li>• &gt;24 months</li> </ul> | <ul style="list-style-type: none"> <li>• 0.6295</li> <li>• 0.6881</li> <li>• 0.5559</li> <li>• 0.5304</li> </ul> | <ul style="list-style-type: none"> <li>• OR 2.93 95% CI ( 0.94 , 9.63 )</li> <li>• None of the patients who were on this treatment experienced AO in this time frame</li> <li>• OR 0.59 95% CI ( 0.15 , 1.84 )</li> <li>• OR 0.76 95% CI ( 0.23 , 2.24 )</li> </ul> | <ul style="list-style-type: none"> <li>• p= 0.07</li> <li>• NA</li> <li>• p= 0.39</li> <li>• p= 0.63</li> </ul> |
